# Supplementary material for: Microstructure and sintering behavior of low temperature cofired Li4/5Mg4/5Ti7/5O4 ceramics containing BaCu(B2O5) and TiO2 and their compatibility with a silver electrode
Source: Royal Society of Chemistry journal article supplement (doi:10.1039/c7ra07203a), 2017-01-01
Supplement: c7ra07203a1.pdf [file c7ra07203a1.pdf]

**Figure Captions**

**FIG.S1** SEM micrographs of the LMT ceramics sintered at (a) 1050 °C, (b) 1075 °C, (c) 1100 °C and (d) 1125 °C.

**FIG.S2** Room-temperature XRD patterns of the  $(1-x)\text{LMT}-x\text{BCB}$  ceramics sintered at their optimized temperatures: (a)  $x=0.01$ , 1000 °C; (b)  $x=0.02$ , 975 °C; (c)  $x=0.03$ , 900 °C; (d)  $x=0.04$ , 900 °C.

**FIG.S3** SEM micrographs of the  $(1-x)\text{LMT}-x\text{BCB}$  ceramics sintered at their optimized temperatures: (a)  $x=0.01$ , 1000 °C; (b)  $x=0.02$ , 975 °C; (c)  $x=0.03$ , 900 °C; (d)  $x=0.04$ , 900 °C.

**FIG.S4** SEM micrographs of the  $(1-y)[0.97\text{LMT}-0.03\text{BCB}]-y\text{TiO}_2$  ( $y= 0.05, 0.10, 0.15, 0.20$ ) ceramics sintered at their optimized temperatures: (a)  $y=0.05$ , 875 °C; (b)  $y=0.10$ , 875 °C; (c)  $y=0.15$ , 875 °C; (d)  $y=0.20$ , 900 °C. (The EDS analysis of  $0.85[0.97\text{LMT}-0.03\text{BCB}]-0.15\text{TiO}_2$  ceramics are inserted)

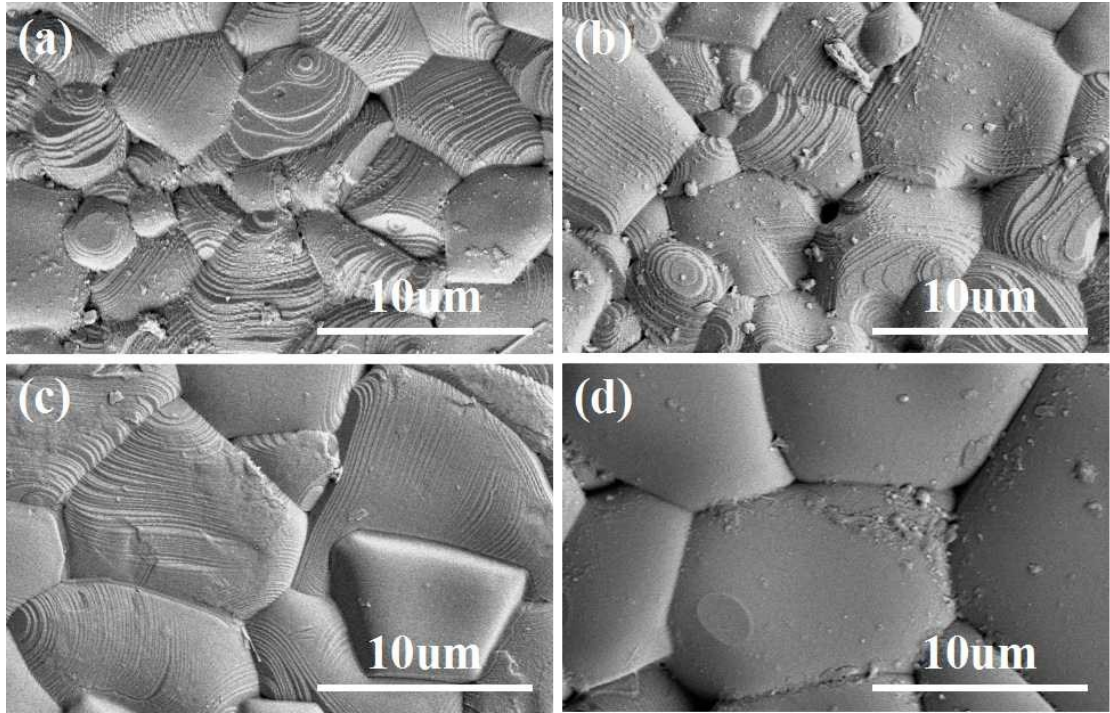

FIG.S1

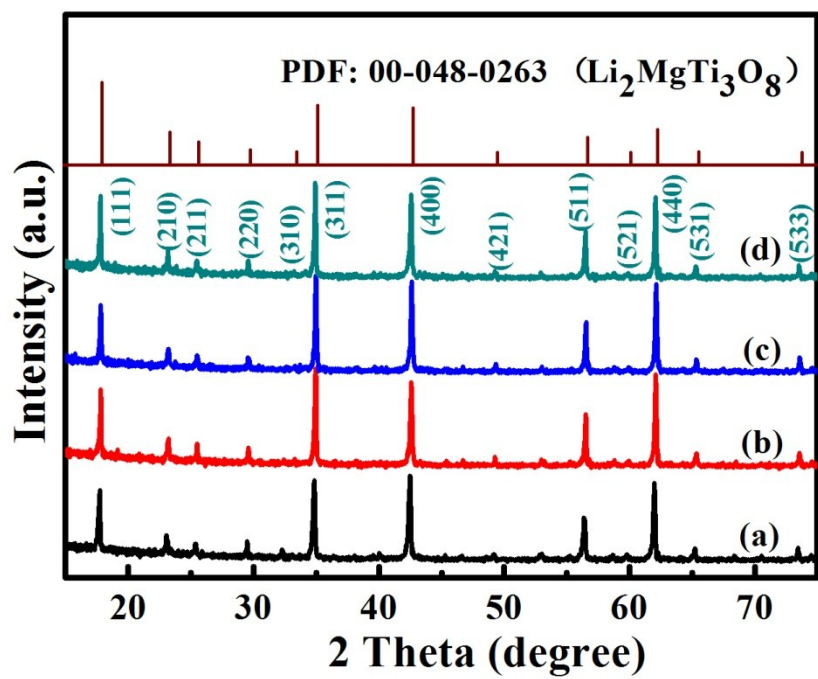

FIG.S2

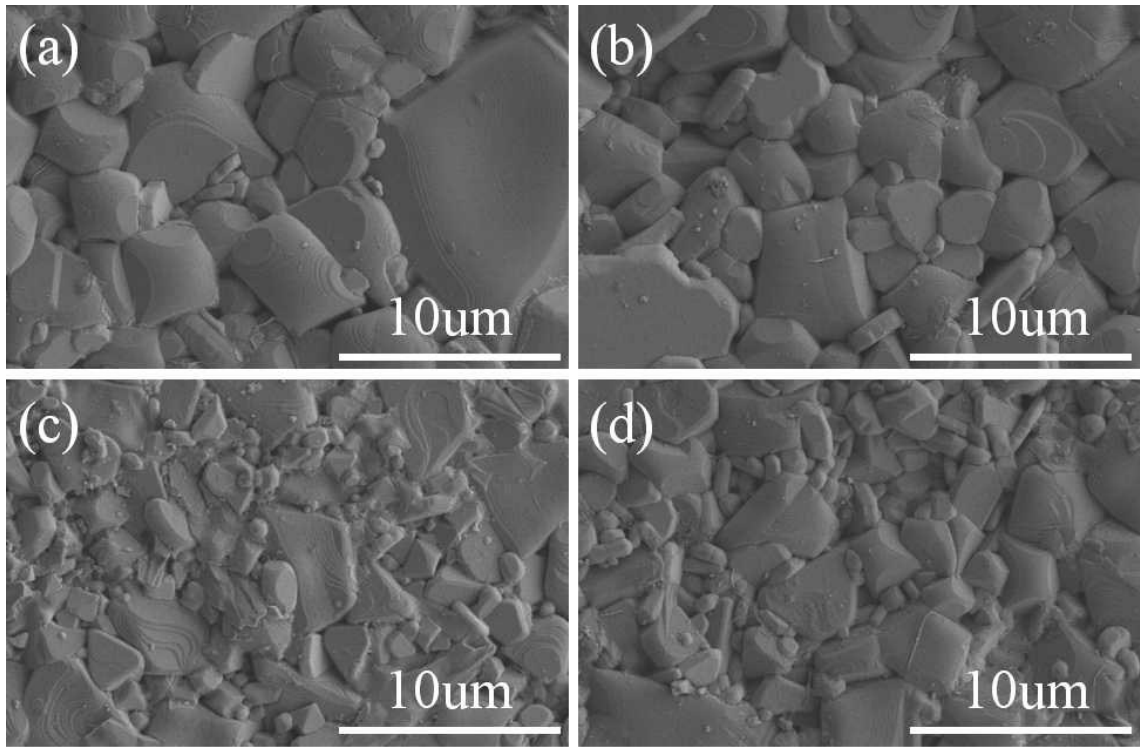

FIG.S3

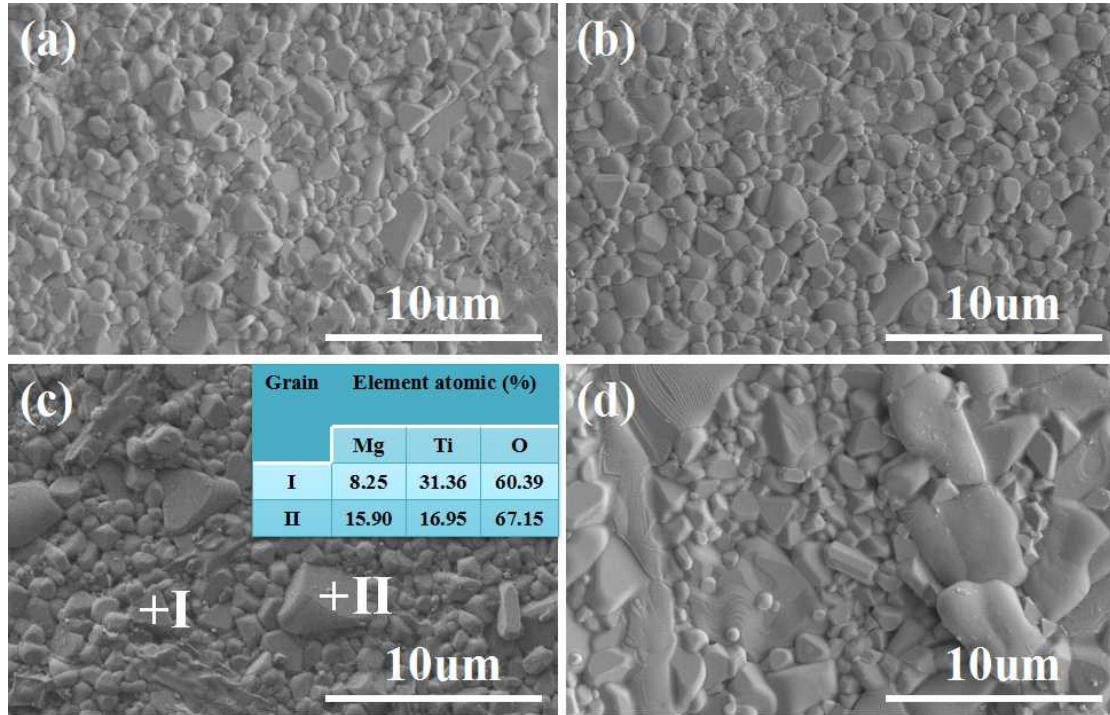

FIG.S4
